# Supplementary material
Source: PubMed Central journal article supplement (PMC5421364)

# Figure S1

**A**

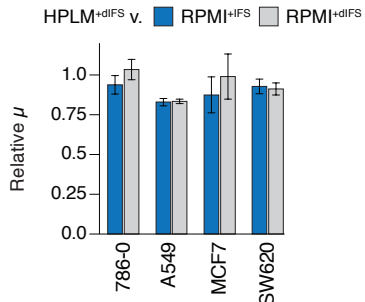

**B**

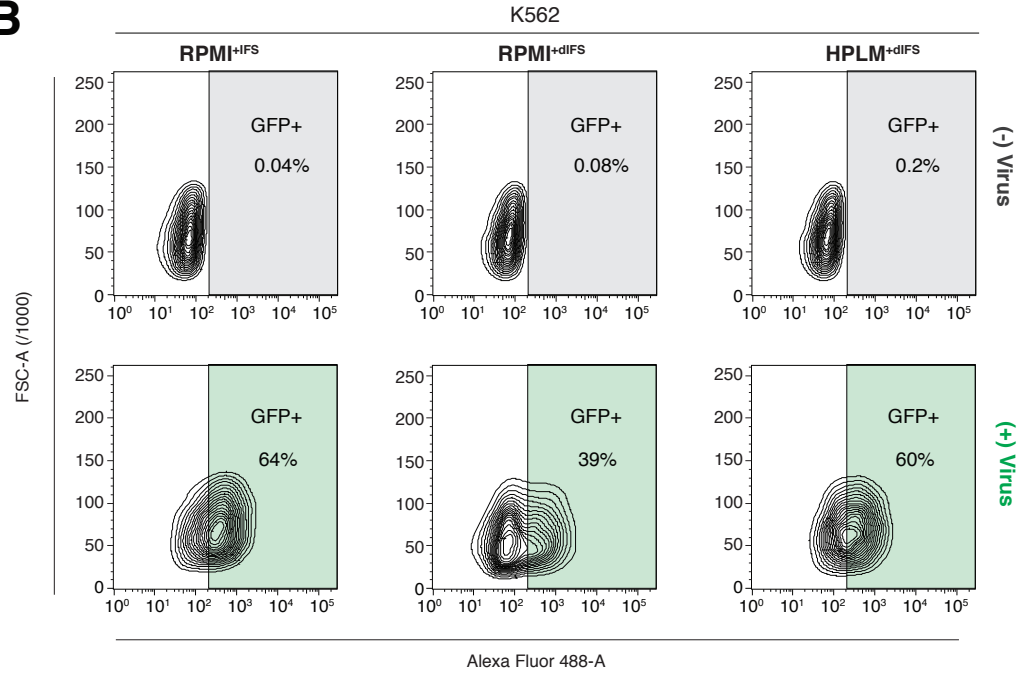

**C**

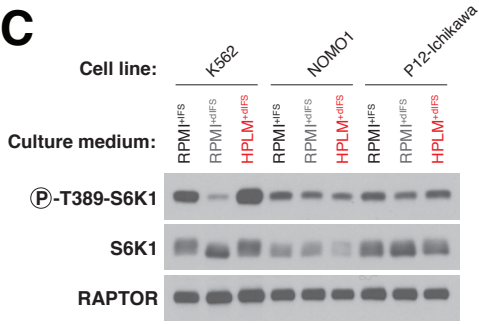

Supplement: NIHMS861963-supplement-1.pdf [file NIHMS861963-supplement-1.pdf]

# Figure S2

**A**

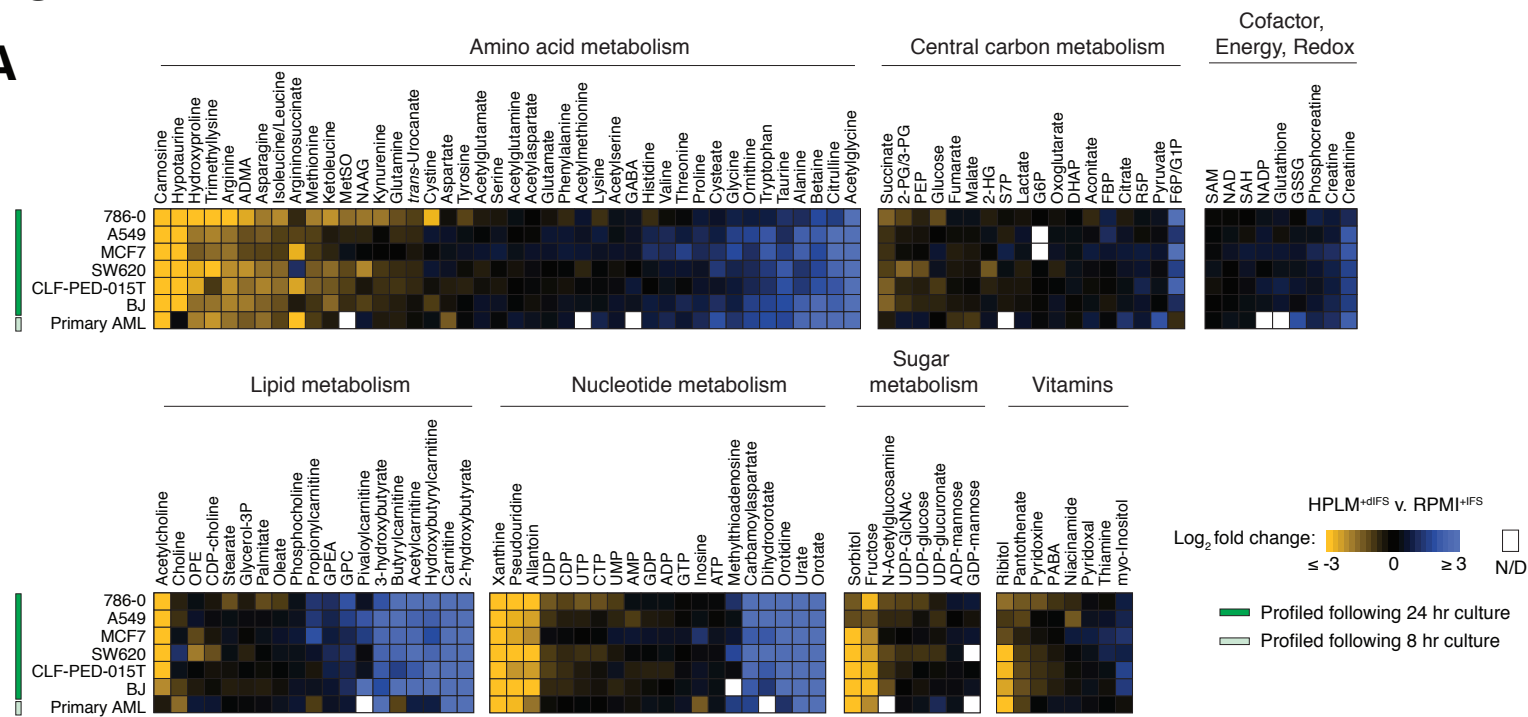

**B**

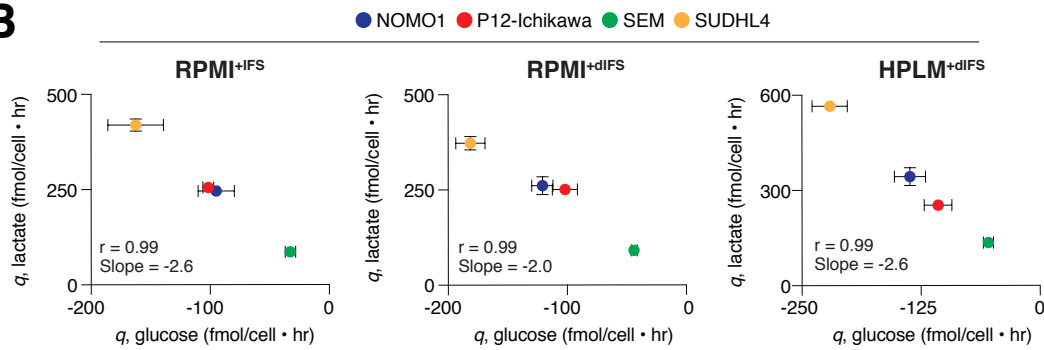

**C**

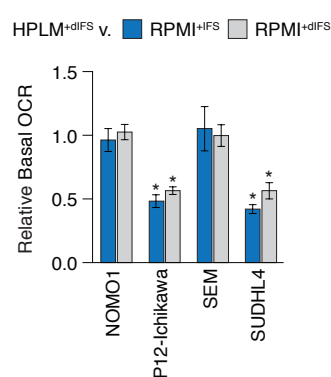

**D**

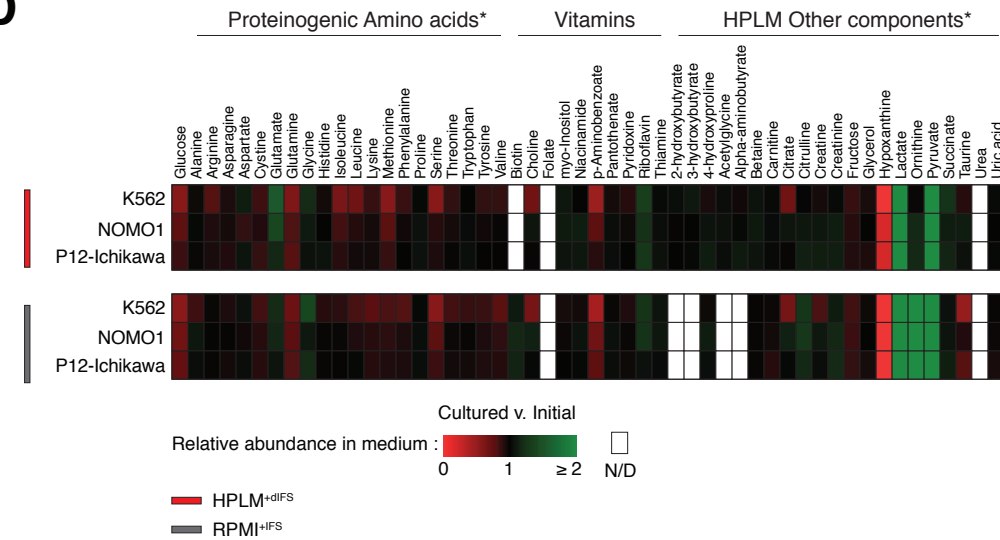

Supplement: NIHMS861963-supplement-2.pdf [file NIHMS861963-supplement-2.pdf]

# Figure S3

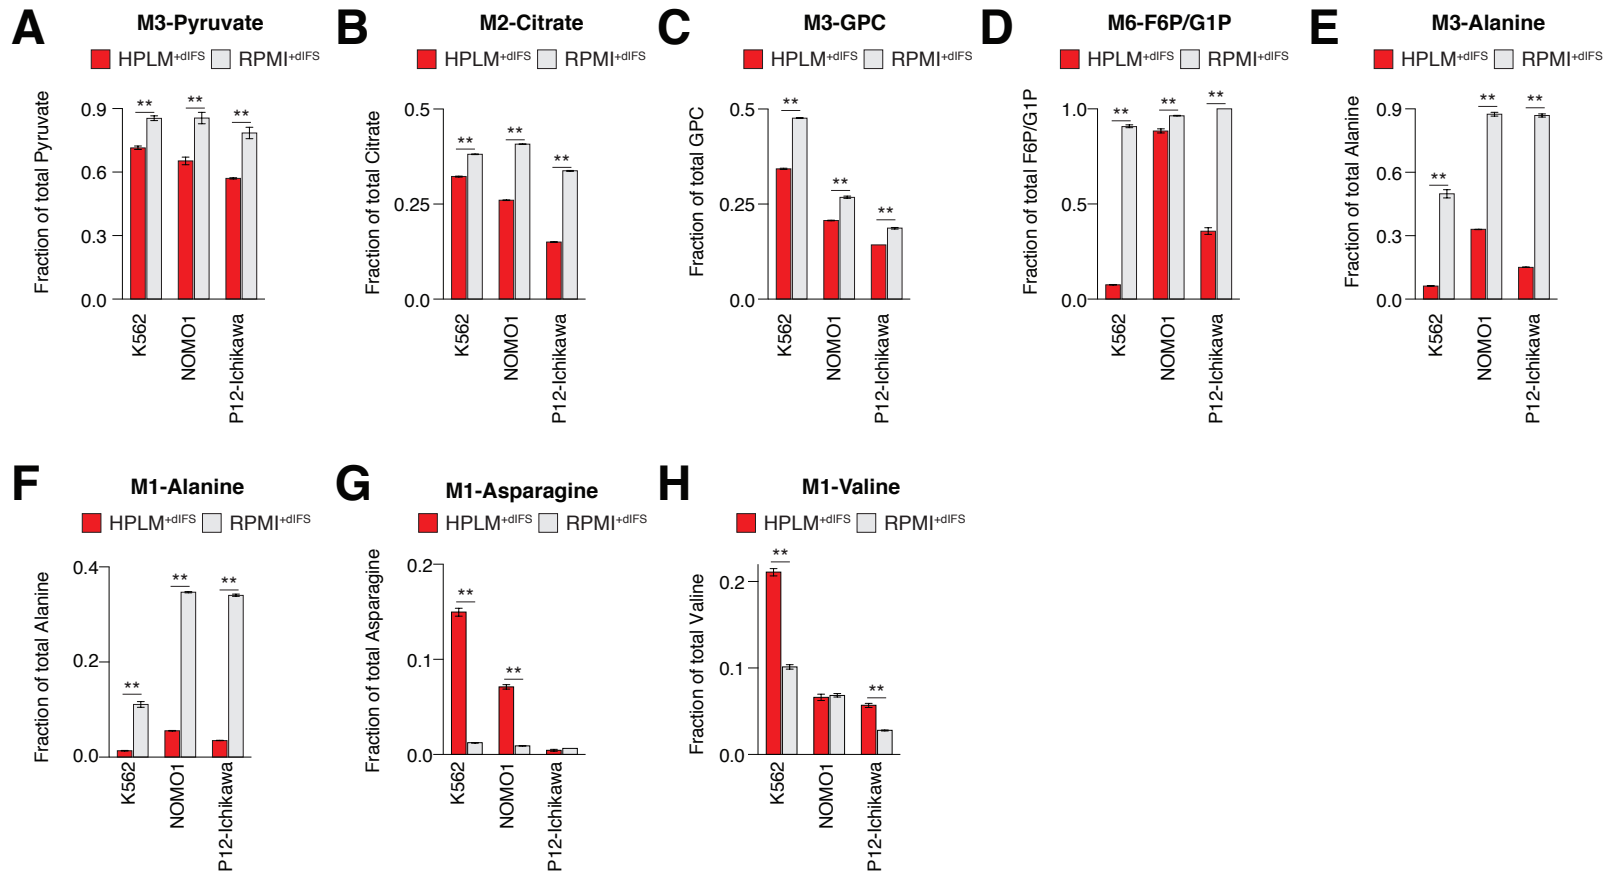

Supplement: NIHMS861963-supplement-3.pdf [file NIHMS861963-supplement-3.pdf]

# Figure S4

## A

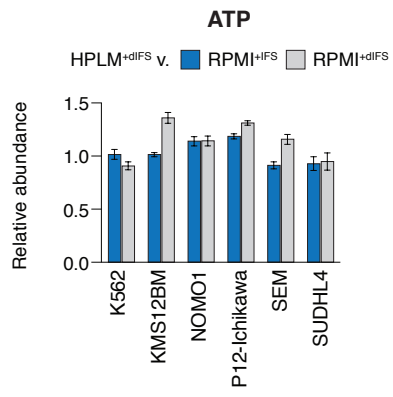

## B

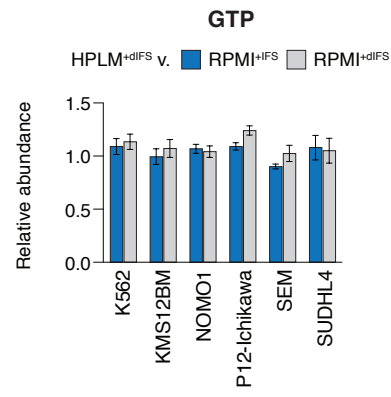

Supplement: NIHMS861963-supplement-4.pdf [file NIHMS861963-supplement-4.pdf]

# Figure S5

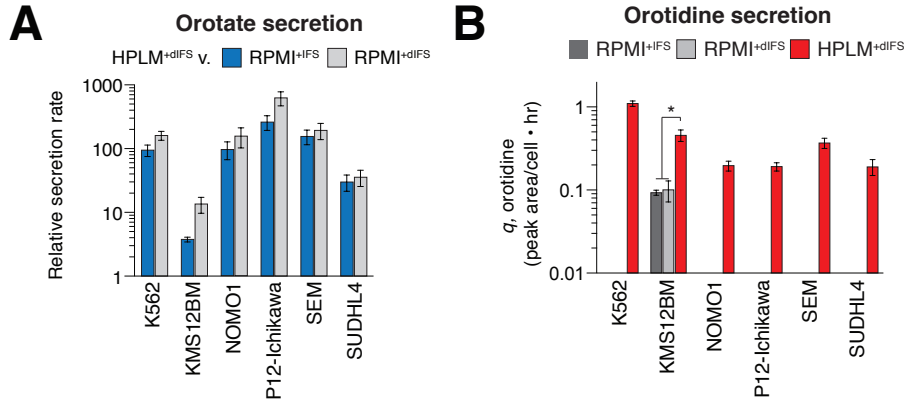

Supplement: NIHMS861963-supplement-5.pdf [file NIHMS861963-supplement-5.pdf]

# Figure S6

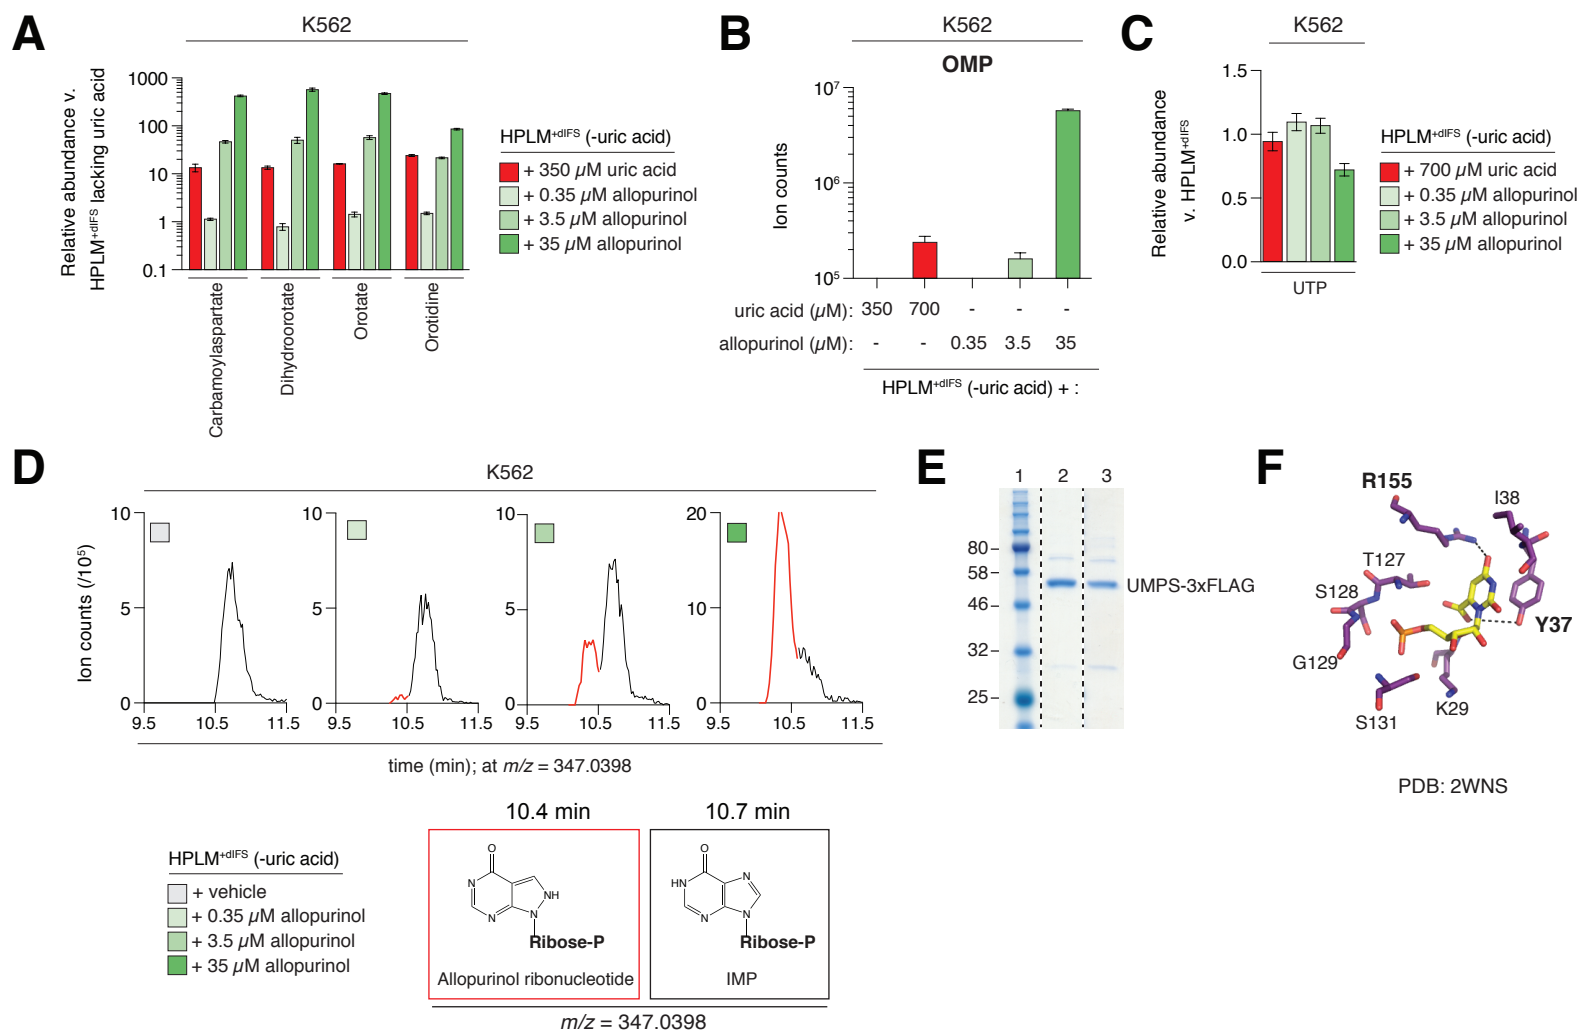

Supplement: NIHMS861963-supplement-6.pdf [file NIHMS861963-supplement-6.pdf]

# Figure S7

## A

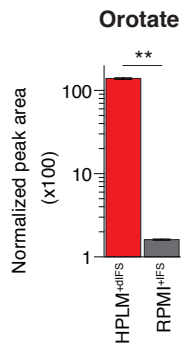

## B

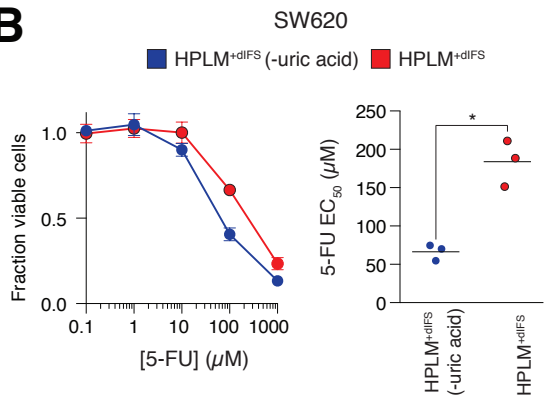

## C

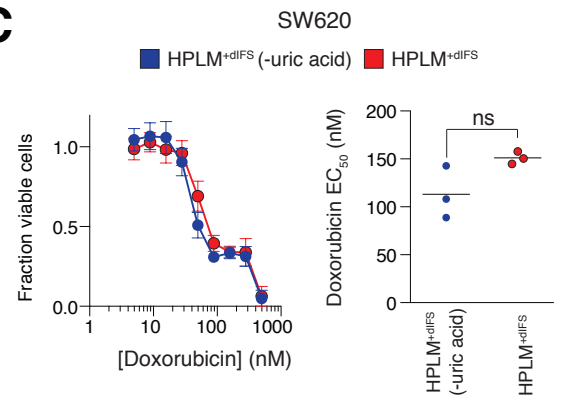

Supplement: NIHMS861963-supplement-7.pdf [file NIHMS861963-supplement-7.pdf]
